# Supplementary material for: Heat Transfer Analysis of 3D Printed Wax Injection Mold Used in Investment Casting
Source: MDPI journal article supplement (doi:10.3390/ma15196545), 2022-09-21
Supplement: s1 [file s1]

# Table S1

| Model variant              | Cooling medium            | Sample middle point temperature [°C] |      |      |      |      |      |      |      |      |      |      |      |      |      |      |      |
|----------------------------|---------------------------|--------------------------------------|------|------|------|------|------|------|------|------|------|------|------|------|------|------|------|
|                            |                           | Time [s]                             |      |      |      |      |      |      |      |      |      |      |      |      |      |      |      |
|                            |                           | 5                                    | 10   | 15   | 20   | 25   | 30   | 35   | 40   | 45   | 50   | 55   | 60   | 65   | 70   | 75   | 80   |
| Aluminium without channels | n.a.                      | 46,4                                 | 32,7 | 26,2 | 23,3 | 21,9 | 21,2 | 20,9 | 20,8 | 20,7 | 20,7 | 20,6 | 20,6 | 20,6 | 20,6 | 20,6 | 20,6 |
| Resin without channels     | n.a.                      | 53,9                                 | 45,4 | 40,0 | 36,3 | 33,7 | 31,8 | 30,4 | 29,2 | 28,3 | 27,6 | 26,9 | 26,4 | 26,0 | 25,6 | 25,3 | 25,0 |
| Finned                     | water [20°C] - 0.02 kg/s  | 49,1                                 | 39,1 | 32,8 | 28,7 | 25,9 | 24,1 | 22,8 | 22,0 | 21,4 | 21,0 | 20,7 | 20,5 | 20,3 | 20,2 | 20,2 | 20,1 |
|                            | air [-23°C] - 0.0003 kg/s | 48,5                                 | 40,3 | 35,7 | 32,5 | 30,0 | 27,8 | 26,0 | 24,2 | 22,7 | 21,2 | 19,8 | 18,5 | 17,3 | 16,1 | 14,9 | 13,9 |
|                            | air [-23°C] - 0.0006 kg/s | 48,6                                 | 40,4 | 35,6 | 32,0 | 29,1 | 26,5 | 24,2 | 22,0 | 20,0 | 18,2 | 16,4 | 14,8 | 13,2 | 11,7 | 10,3 | 9,0  |
|                            | air [-23°C] - 0.001 kg/s  | 48,8                                 | 39,9 | 35,5 | 32,2 | 28,5 | 25,1 | 22,0 | 19,1 | 16,5 | 14,1 | 11,8 | 9,8  | 7,8  | 6,1  | 4,4  | 2,9  |
| Square channel             | water [20°C] - 0.02 kg/s  | 50,0                                 | 41,1 | 35,2 | 31,2 | 28,2 | 26,1 | 24,5 | 23,4 | 22,5 | 21,9 | 21,4 | 21,1 | 20,8 | 20,6 | 20,5 | 20,3 |
|                            | air [-23°C] - 0.0003 kg/s | 50,2                                 | 41,6 | 36,7 | 33,3 | 30,8 | 28,8 | 27,0 | 25,5 | 24,1 | 22,8 | 21,6 | 20,5 | 19,4 | 18,4 | 17,5 | 16,5 |
|                            | air [-23°C] - 0.0006 kg/s | 50,2                                 | 41,7 | 36,6 | 32,9 | 29,8 | 27,2 | 24,9 | 22,7 | 20,7 | 18,8 | 17,0 | 15,4 | 13,8 | 12,4 | 11,0 | 9,6  |
|                            | air [-23°C] - 0.001 kg/s  | 50,3                                 | 40,8 | 35,9 | 32,4 | 29,4 | 26,8 | 24,5 | 22,4 | 20,4 | 18,5 | 16,8 | 15,2 | 13,7 | 12,2 | 10,9 | 9,6  |
| Rounded channel            | water [20°C] - 0.02 kg/s  | 51,2                                 | 42,3 | 36,8 | 33,0 | 30,1 | 28,0 | 26,3 | 25,0 | 24,0 | 23,2 | 22,5 | 22,0 | 21,6 | 21,3 | 21,1 | 20,9 |
|                            | air [-23°C] - 0.0003 kg/s | 51,2                                 | 42,2 | 37,1 | 33,6 | 31,0 | 28,9 | 27,1 | 25,5 | 24,1 | 22,9 | 21,7 | 20,6 | 19,5 | 18,5 | 17,6 | 16,7 |
|                            | air [-23°C] - 0.0006 kg/s | 51,1                                 | 42,3 | 37,0 | 33,3 | 30,4 | 27,9 | 25,7 | 23,7 | 21,9 | 20,2 | 18,6 | 17,1 | 15,7 | 14,4 | 13,1 | 11,9 |
|                            | air [-23°C] - 0.001 kg/s  | 51,2                                 | 42,3 | 36,9 | 33,0 | 29,7 | 26,9 | 24,3 | 21,9 | 19,7 | 17,7 | 15,8 | 14,0 | 12,4 | 10,8 | 9,3  | 7,9  |

## Table S2

| Model variant              | Cooling medium            | Average sample temperature [°C] |      |      |      |      |      |      |      |      |      |      |      |      |      |      |      |
|----------------------------|---------------------------|---------------------------------|------|------|------|------|------|------|------|------|------|------|------|------|------|------|------|
|                            |                           | Time [s]                        |      |      |      |      |      |      |      |      |      |      |      |      |      |      |      |
|                            |                           | 5                               | 10   | 15   | 20   | 25   | 30   | 35   | 40   | 45   | 50   | 55   | 60   | 65   | 70   | 75   | 80   |
| Aluminium without channels | n.a.                      | 32,8                            | 27,0 | 24,0 | 22,4 | 21,6 | 21,2 | 20,9 | 20,8 | 20,7 | 20,7 | 20,6 | 20,6 | 20,6 | 20,6 | 20,6 | 20,6 |
| Resin without channels     | n.a.                      | 45,6                            | 40,8 | 37,6 | 35,2 | 33,3 | 31,8 | 30,7 | 29,7 | 28,9 | 28,2 | 27,6 | 27,1 | 26,7 | 26,3 | 25,9 | 25,6 |
| Finned                     | water [20°C] - 0.02 kg/s  | 37,4                            | 32,0 | 28,3 | 25,8 | 24,1 | 22,8 | 22,0 | 21,4 | 21,0 | 20,7 | 20,5 | 20,4 | 20,2 | 20,2 | 20,1 | 20,1 |
|                            | air [-23°C] - 0.0003 kg/s | 38,9                            | 34,9 | 31,8 | 29,2 | 26,8 | 24,7 | 22,8 | 21,0 | 19,4 | 17,8 | 16,4 | 15,0 | 13,8 | 12,6 | 11,4 | 10,4 |
|                            | air [-23°C] - 0.0006 kg/s | 38,7                            | 34,3 | 30,7 | 27,6 | 24,8 | 22,3 | 19,9 | 17,8 | 15,8 | 13,9 | 12,2 | 10,5 | 9,0  | 7,6  | 6,3  | 5,1  |
|                            | air [-23°C] - 0.001 kg/s  | 38,9                            | 34,2 | 30,6 | 26,6 | 23,1 | 20,0 | 17,2 | 14,6 | 12,3 | 10,1 | 8,2  | 6,4  | 4,7  | 3,2  | 1,8  | 0,5  |
| Square channel             | water [20°C] - 0.02 kg/s  | 40,1                            | 34,4 | 30,6 | 27,8 | 25,9 | 24,4 | 23,3 | 22,5 | 21,9 | 21,5 | 21,1 | 20,9 | 20,7 | 20,5 | 20,4 | 20,3 |
|                            | air [-23°C] - 0.0003 kg/s | 41,6                            | 37,2 | 33,9 | 31,2 | 29,0 | 27,1 | 25,4 | 23,8 | 22,4 | 21,1 | 19,8 | 18,7 | 17,6 | 16,6 | 15,7 | 14,7 |
|                            | air [-23°C] - 0.0006 kg/s | 41,4                            | 36,4 | 32,5 | 29,3 | 26,4 | 23,9 | 21,7 | 19,6 | 17,6 | 15,9 | 14,2 | 12,7 | 11,2 | 9,9  | 8,6  | 7,4  |
|                            | air [-23°C] - 0.001 kg/s  | 41,0                            | 34,6 | 31,0 | 27,9 | 25,2 | 22,6 | 20,3 | 18,1 | 16,1 | 14,3 | 12,6 | 11,0 | 9,6  | 8,2  | 7,0  | 5,8  |
| Rounded channel            | water [20°C] - 0.02 kg/s  | 29,6                            | 27,6 | 26,1 | 24,9 | 23,9 | 23,2 | 22,6 | 22,1 | 21,7 | 21,4 | 21,1 | 20,9 | 20,8 | 20,6 | 20,5 | 20,4 |
|                            | air [-23°C] - 0.0003 kg/s | 41,6                            | 37,0 | 33,8 | 31,2 | 29,0 | 27,1 | 25,5 | 24,0 | 22,7 | 21,4 | 20,2 | 19,2 | 18,1 | 17,2 | 16,3 | 15,4 |
|                            | air [-23°C] - 0.0006 kg/s | 41,5                            | 36,6 | 33,0 | 30,0 | 27,5 | 25,2 | 23,2 | 21,3 | 19,6 | 18,0 | 16,5 | 15,1 | 13,8 | 12,5 | 11,3 | 10,2 |
|                            | air [-23°C] - 0.001 kg/s  | 41,4                            | 36,2 | 32,3 | 28,9 | 26,0 | 23,4 | 21,0 | 18,9 | 16,9 | 15,0 | 13,3 | 11,6 | 10,1 | 8,7  | 7,3  | 6,1  |
